# Supplementary material
Source: Springer Nature journal article supplement (https://www.springermedizin.de/resource/supplementary/12884_2013_838_MOESM1_ESM.pdf/9458316)

Plasma concentrations of diazepam [ $\mu\text{g/mL}$ ]

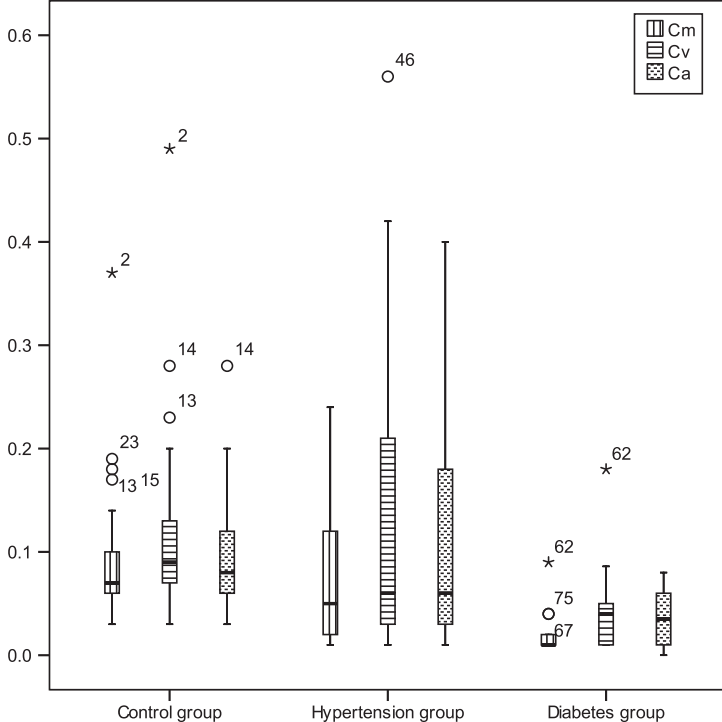

Supplement: MOESM1 [file 9458316]
